# Supplementary material for: Interactions of climate, socio-economics, and global mercury pollution in the North Water
Source: Springer Nature journal article supplement (doi:10.1007/s13280-018-1033-z), 2018-03-07
Supplement: MOESM1 [file 15655074]

**Ambio**

**Electronic Supplementary Material**

**This supplementary material has not been peer reviewed.**

**Title: Interactions of climate, socio-economics and global mercury pollution  
in the North Water region**

**Authors: Rune Dietz, Anders Mosbech, Janne Flora and Igor Eulaers**

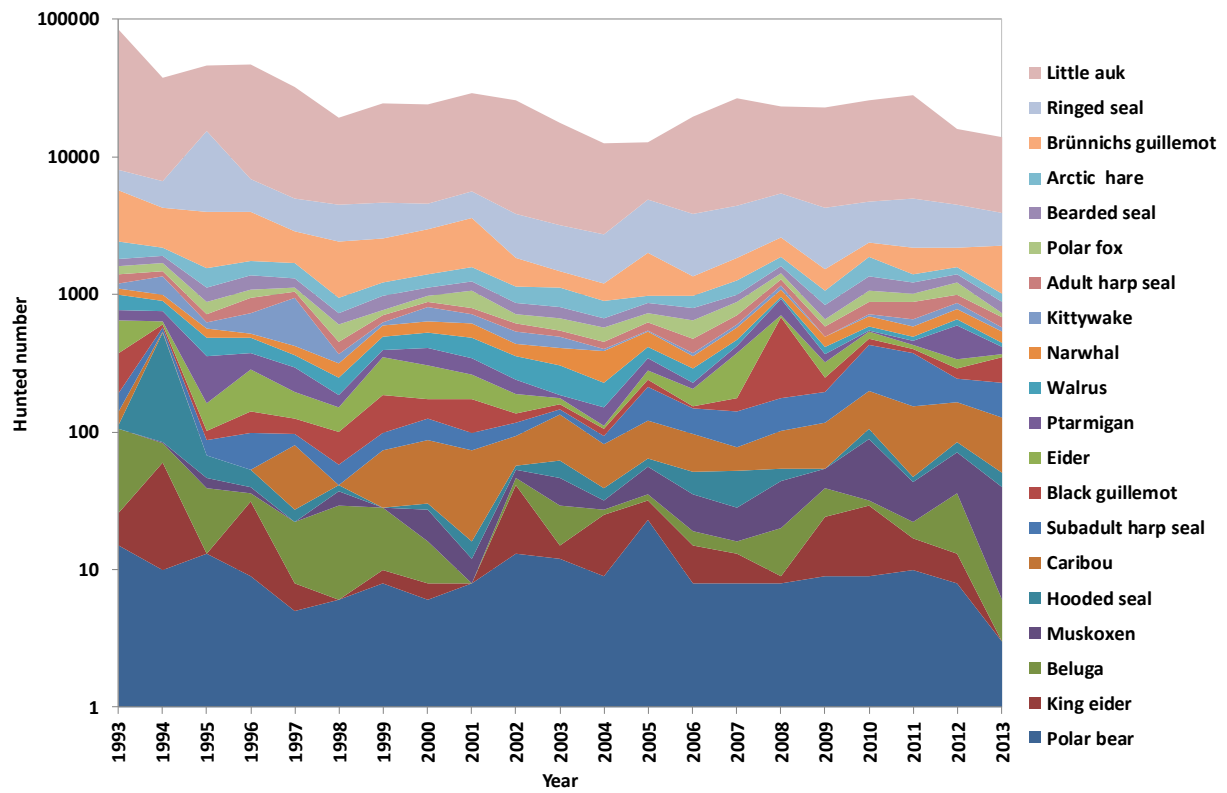

**Fig. S1** Yearly number of wildlife prey obtained from the aboriginal hunt in Avanersuaq between 1983 and 2013. Exact numbers are provided in SI Table 1. Source: Piniarneq, Greenland Home Government.

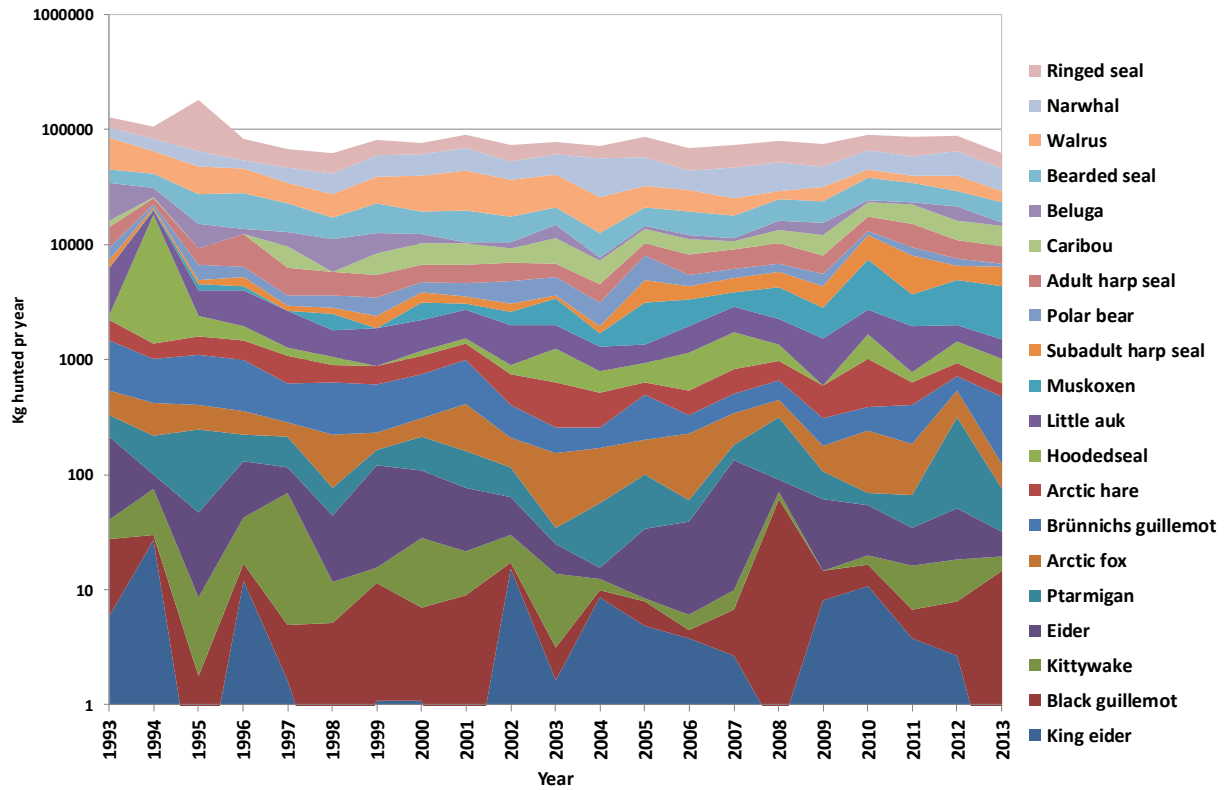

**Fig. S2** Estimated yearly amounts of meat (Kg) obtained from the aboriginal hunt in Avanersuaq between 1983 and 2013. Exact numbers are provided in SI Table 2. Figures calculated from the hunt information of Piniarneq, Greenland Home Government.

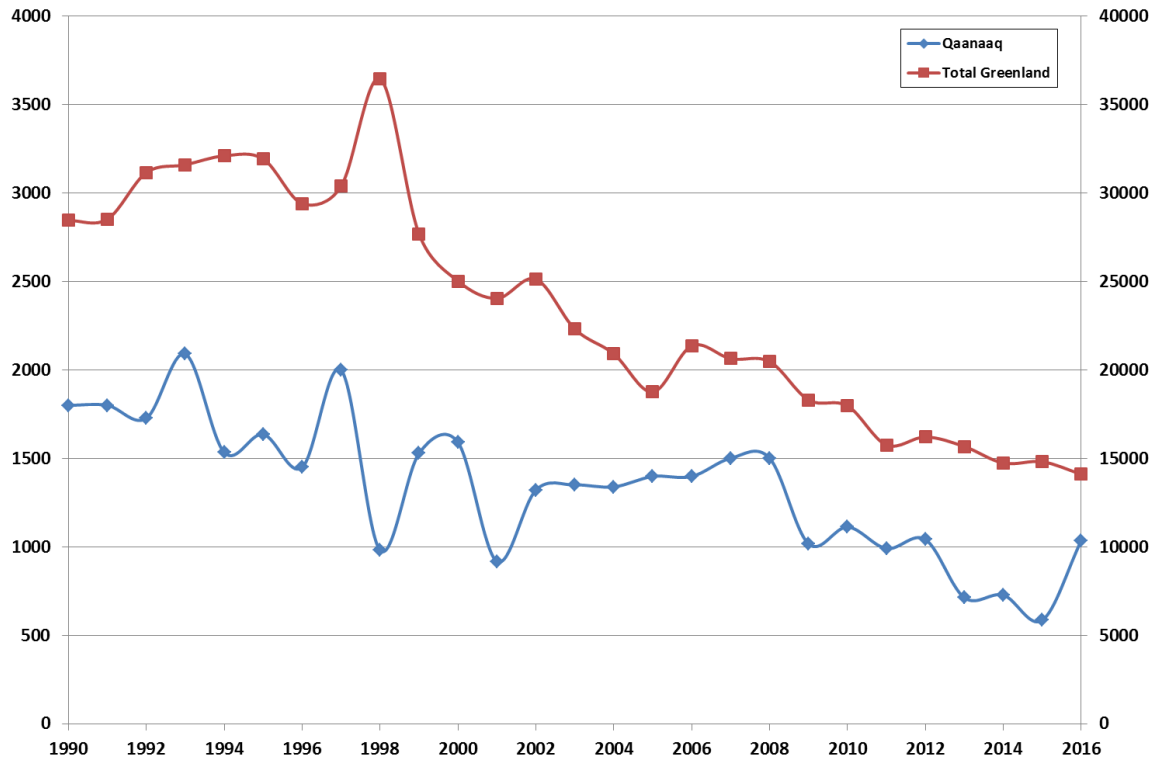

**Fig S3** Decline in sled dog numbers in the NOW region (left Y-axis) as well as in the entire Greenland (right Y-axis) based on information from Greenland Statistics.

**Table S1** Temporal number of hunted game of Avanersuaq, NW Greenland based from 1993 to 2013 (Piniarneq 2016).

| Species\Year      | 1993          | 1994          | 1995          | 1996          | 1997          | 1998          | 1999          | 2000          | 2001          | 2002          | 2003          | 2004          | 2005          | 2006          | 2007          | 2008          | 2009          | 2010          | 2011          | 2012          | 2013          | Average       |
|-------------------|---------------|---------------|---------------|---------------|---------------|---------------|---------------|---------------|---------------|---------------|---------------|---------------|---------------|---------------|---------------|---------------|---------------|---------------|---------------|---------------|---------------|---------------|
| Polar bear        | 15            | 10            | 13            | 9             | 5             | 6             | 8             | 6             | 8             | 13            | 12            | 9             | 23            | 8             | 8             | 8             | 9             | 9             | 10            | 8             | 3             | 10            |
| King eider        | 11            | 50            | 0             | 22            | 3             | 0             | 2             | 2             | 0             | 28            | 3             | 16            | 9             | 7             | 5             | 1             | 15            | 20            | 7             | 5             | 0             | 10            |
| Beluga            | 79            | 23            | 26            | 5             | 14            | 23            | 18            | 8             | 0             | 5             | 14            | 2             | 3             | 4             | 3             | 11            | 15            | 3             | 5             | 23            | 3             | 14            |
| Musk oxen         | 0             | 1             | 7             | 4             | 0             | 8             | 0             | 11            | 4             | 7             | 17            | 5             | 21            | 16            | 12            | 24            | 15            | 56            | 21            | 35            | 34            | 14            |
| Hooded seal       | 7             | 444           | 21            | 13            | 5             | 4             | 0             | 3             | 4             | 4             | 16            | 7             | 8             | 16            | 24            | 10            | 17            | 4             | 13            | 10            | 32            | 32            |
| Caribou           | 29            | 3             | 0             | 0             | 53            | 0             | 46            | 57            | 57            | 36            | 72            | 43            | 56            | 45            | 26            | 48            | 62            | 93            | 107           | 80            | 78            | 47            |
| Black guillemot   | 182           | 24            | 14            | 43            | 28            | 42            | 87            | 49            | 74            | 19            | 13            | 11            | 26            | 6             | 34            | 503           | 54            | 49            | 25            | 44            | 120           | 69            |
| Eider             | 278           | 39            | 61            | 143           | 72            | 52            | 166           | 129           | 87            | 54            | 18            | 5             | 40            | 53            | 198           | 30            | 75            | 55            | 29            | 52            | 20            | 79            |
| Ptarmigan         | 109           | 117           | 196           | 89            | 96            | 32            | 44            | 103           | 81            | 50            | 9             | 40            | 66            | 20            | 48            | 222           | 43            | 15            | 32            | 257           | 43            | 82            |
| Walrus            | 233           | 140           | 122           | 110           | 72            | 62            | 97            | 122           | 142           | 116           | 118           | 79            | 67            | 63            | 45            | 27            | 46            | 37            | 33            | 61            | 34            | 87            |
| Narwhal           | 105           | 90            | 88            | 37            | 58            | 71            | 104           | 105           | 128           | 81            | 100           | 155           | 127           | 68            | 109           | 114           | 82            | 110           | 94            | 127           | 85            | 97            |
| Kittywake         | 105           | 364           | 54            | 202           | 522           | 53            | 33            | 169           | 103           | 102           | 85            | 19            | 4             | 13            | 25            | 85            | 1             | 26            | 77            | 82            | 40            | 103           |
| Harp seal         | 234           | 165           | 115           | 271           | 115           | 96            | 97            | 113           | 103           | 104           | 70            | 63            | 172           | 156           | 170           | 204           | 169           | 390           | 438           | 204           | 206           | 174           |
| Polar fox         | 215           | 206           | 166           | 140           | 74            | 152           | 68            | 96            | 265           | 98            | 126           | 121           | 104           | 173           | 166           | 134           | 77            | 181           | 124           | 235           | 50            | 141           |
| Bearded seal      | 213           | 209           | 238           | 287           | 195           | 122           | 210           | 147           | 192           | 143           | 129           | 97            | 132           | 151           | 127           | 173           | 167           | 283           | 215           | 159           | 159           | 178           |
| Polar hare        | 612           | 307           | 420           | 385           | 383           | 219           | 234           | 278           | 316           | 279           | 308           | 216           | 119           | 176           | 265           | 267           | 237           | 525           | 186           | 183           | 121           | 287           |
| Brünnichs guillem | 3,262         | 2,088         | 2,448         | 2,236         | 1,163         | 1,461         | 1,313         | 1,550         | 2,016         | 690           | 365           | 303           | 1,027         | 367           | 571           | 746           | 445           | 500           | 766           | 628           | 1,246         | 1,200         |
| Ringed seal       | 2,293         | 2,929         | 11,429        | 2,927         | 2,122         | 2,052         | 2,114         | 1,629         | 2,017         | 2,038         | 1,699         | 1,518         | 2,899         | 2,505         | 2,596         | 2,784         | 2,757         | 2,347         | 2,781         | 2,303         | 1,642         | 2,704         |
| Little auk        | 75,712        | 30,616        | 30,671        | 39,830        | 27,104        | 14,684        | 19,762        | 19,577        | 23,454        | 21,861        | 14,517        | 9,782         | 7,772         | 15,687        | 21,943        | 17,777        | 18,677        | 20,886        | 23,042        | 11,335        | 9,895         | 22,599        |
| <b>Total game</b> | <b>83,694</b> | <b>37,225</b> | <b>46,089</b> | <b>46,753</b> | <b>32,084</b> | <b>19,139</b> | <b>24,403</b> | <b>24,154</b> | <b>29,051</b> | <b>25,728</b> | <b>17,691</b> | <b>12,491</b> | <b>12,675</b> | <b>19,534</b> | <b>26,375</b> | <b>23,168</b> | <b>22,946</b> | <b>25,602</b> | <b>27,996</b> | <b>15,834</b> | <b>13,789</b> | <b>27,925</b> |

**Table S2** Temporal estimated meet intake from hunted game of Avanersuaq, NW Greenland based from 1993 to 2013 (Piniarneq 2016).

| Species\Year      | 1993             | 1994             | 1995             | 1996            | 1997            | 1998            | 1999            | 2000            | 2001            | 2002            | 2003            | 2004            | 2005            | 2006            | 2007            | 2008            | 2009            | 2010            | 2011            | 2012            | 2013            | Mean            |
|-------------------|------------------|------------------|------------------|-----------------|-----------------|-----------------|-----------------|-----------------|-----------------|-----------------|-----------------|-----------------|-----------------|-----------------|-----------------|-----------------|-----------------|-----------------|-----------------|-----------------|-----------------|-----------------|
| King eider        | 5.9              | 27.0             | 0.1              | 11.9            | 1.6             | 0.1             | 1.1             | 1.1             | 0.1             | 15.1            | 1.6             | 8.6             | 4.9             | 3.8             | 2.7             | 0.5             | 8.1             | 10.8            | 3.8             | 2.7             | 0.1             | 5.3             |
| Black guillemot   | 21.8             | 2.9              | 1.7              | 5.2             | 3.4             | 5.0             | 10.4            | 5.9             | 8.9             | 2.3             | 1.6             | 1.3             | 3.1             | 0.7             | 4.1             | 60.4            | 6.5             | 5.9             | 3.0             | 5.3             | 14.4            | 8.3             |
| Kittywake         | 13.1             | 45.3             | 6.7              | 25.1            | 65.0            | 6.6             | 4.1             | 21.0            | 12.8            | 12.7            | 10.6            | 2.4             | 0.5             | 1.6             | 3.1             | 10.6            | 0.1             | 3.2             | 9.6             | 10.2            | 5.0             | 12.8            |
| Eider             | 175.1            | 24.6             | 38.4             | 90.1            | 45.4            | 32.8            | 104.6           | 81.3            | 54.8            | 34.0            | 11.3            | 3.2             | 25.2            | 33.4            | 124.7           | 18.9            | 47.3            | 34.7            | 18.3            | 32.8            | 12.6            | 49.7            |
| Ptarmigan         | 111.2            | 119.3            | 199.9            | 90.8            | 97.9            | 32.6            | 44.9            | 105.1           | 82.6            | 51.0            | 9.2             | 40.8            | 67.3            | 20.4            | 49.0            | 226.4           | 43.9            | 15.3            | 32.6            | 262.1           | 43.9            | 83.2            |
| Polar fox         | 206.4            | 197.8            | 159.4            | 134.4           | 71.0            | 145.9           | 65.3            | 92.2            | 254.4           | 94.1            | 121.0           | 116.2           | 99.8            | 166.1           | 159.4           | 128.6           | 73.9            | 173.8           | 119.0           | 225.6           | 48.0            | 135.8           |
| Brünnichs guillem | 929.7            | 595.1            | 697.7            | 637.3           | 331.5           | 416.4           | 374.2           | 441.8           | 574.6           | 196.7           | 104.0           | 86.4            | 292.7           | 104.6           | 162.7           | 212.6           | 126.8           | 142.5           | 218.3           | 179.0           | 355.1           | 341.9           |
| Polar hare        | 734.4            | 368.4            | 504.0            | 462.0           | 459.6           | 262.8           | 280.8           | 333.6           | 379.2           | 334.8           | 369.6           | 259.2           | 142.8           | 211.2           | 318.0           | 320.4           | 284.4           | 630.0           | 223.2           | 219.6           | 145.2           | 344.9           |
| Hooded seal       | 268.3            | 17,020.0         | 805.0            | 498.3           | 191.7           | 153.3           | 0.1             | 115.0           | 153.3           | 153.3           | 613.3           | 268.3           | 306.7           | 613.3           | 920.0           | 383.3           | 0.1             | 651.7           | 153.3           | 498.3           | 383.3           | 1,150.0         |
| Little auk        | 3,861.3          | 1,561.4          | 1,564.2          | 2,031.3         | 1,382.3         | 748.9           | 1,007.9         | 998.4           | 1,196.2         | 1,114.9         | 740.4           | 498.9           | 396.4           | 800.0           | 1,119.1         | 906.6           | 952.5           | 1,065.2         | 1,175.1         | 578.1           | 504.6           | 1,152.6         |
| Musk oxen         | 0.1              | 84.0             | 588.0            | 336.0           | 0.1             | 672.0           | 0.1             | 924.0           | 336.0           | 588.0           | 1,428.0         | 420.0           | 1,764.0         | 1,344.0         | 1,008.0         | 2,016.0         | 1,260.0         | 4,704.0         | 1,764.0         | 2,940.0         | 2,856.0         | 1,192.0         |
| Polar hare        | 2,025.0          | 1,350.0          | 1,755.0          | 1,215.0         | 675.0           | 810.0           | 1,080.0         | 810.0           | 1,080.0         | 1,755.0         | 1,620.0         | 1,215.0         | 3,105.0         | 1,080.0         | 1,080.0         | 1,080.0         | 1,215.0         | 1,215.0         | 1,350.0         | 1,080.0         | 405.0           | 1,285.7         |
| Harp seal         | 5,900.0          | 4,106.7          | 2,933.3          | 6,920.0         | 2,960.0         | 2,446.7         | 2,420.0         | 2,760.0         | 2,573.3         | 2,613.3         | 1,786.7         | 1,600.0         | 3,973.3         | 3,813.3         | 4,113.3         | 4,940.0         | 3,986.7         | 8,866.7         | 10,226.7        | 4,906.7         | 4,820.0         | 4,222.2         |
| Rensdyr           | 1,870.5          | 193.5            | 0.1              | 0.1             | 3,418.5         | 0.1             | 2,967.0         | 3,676.5         | 3,676.5         | 2,322.0         | 4,644.0         | 2,773.5         | 3,612.0         | 2,902.5         | 1,677.0         | 3,096.0         | 3,999.0         | 5,998.5         | 6,901.5         | 5,160.0         | 5,031.0         | 3,043.8         |
| Beluga            | 18,433.3         | 5,366.7          | 6,066.7          | 1,166.7         | 3,266.7         | 5,366.7         | 4,200.0         | 1,866.7         | 0.1             | 1,166.7         | 3,266.7         | 466.7           | 700.0           | 933.3           | 700.0           | 2,566.7         | 3,500.0         | 700.0           | 1,166.7         | 5,366.7         | 700.0           | 3,188.9         |
| Bearded seal      | 10,650.0         | 10,450.0         | 11,900.0         | 14,350.0        | 9,750.0         | 6,100.0         | 10,500.0        | 7,350.0         | 9,600.0         | 7,150.0         | 6,450.0         | 4,850.0         | 6,600.0         | 7,550.0         | 6,350.0         | 8,650.0         | 8,350.0         | 14,150.0        | 10,750.0        | 7,950.0         | 7,950.0         | 8,923.8         |
| Walrus            | 38,833.3         | 23,333.3         | 20,333.3         | 18,333.3        | 12,000.0        | 10,333.3        | 16,166.7        | 20,333.3        | 23,666.7        | 19,333.3        | 19,666.7        | 13,166.7        | 11,166.7        | 10,500.0        | 7,500.0         | 4,500.0         | 7,666.7         | 6,166.7         | 5,500.0         | 10,166.7        | 5,666.7         | 14,492.1        |
| Narwhal           | 21,000.0         | 18,000.0         | 17,600.0         | 7,400.0         | 11,600.0        | 14,200.0        | 20,800.0        | 21,000.0        | 25,600.0        | 16,200.0        | 20,000.0        | 31,000.0        | 25,400.0        | 13,600.0        | 21,800.0        | 22,800.0        | 16,400.0        | 22,000.0        | 18,800.0        | 25,400.0        | 17,000.0        | 19,409.5        |
| Ringed seal       | 22,930.0         | 23,290.0         | 114,290.0        | 29,270.0        | 21,220.0        | 20,520.0        | 21,140.0        | 16,290.0        | 20,170.0        | 20,380.0        | 16,990.0        | 15,180.0        | 28,990.0        | 25,050.0        | 25,960.0        | 27,840.0        | 27,570.0        | 23,470.0        | 27,810.0        | 23,030.0        | 16,420.0        | 27,038.6        |
| <b>Total</b>      | <b>127,969.6</b> | <b>106,135.9</b> | <b>179,443.5</b> | <b>82,977.5</b> | <b>67,539.6</b> | <b>62,253.2</b> | <b>81,167.1</b> | <b>77,205.8</b> | <b>89,419.5</b> | <b>73,517.2</b> | <b>77,834.6</b> | <b>71,957.0</b> | <b>86,650.4</b> | <b>68,728.3</b> | <b>73,051.1</b> | <b>79,757.1</b> | <b>75,490.9</b> | <b>90,003.8</b> | <b>86,225.1</b> | <b>88,013.7</b> | <b>62,360.9</b> | <b>86,081.0</b> |

**Table S3** Mercury concentration in game of Northwest Greenland based on published literature and the present study.

| Species                    | Hg Conc (ppm) | Region          | Year               | n   | Reference                  |
|----------------------------|---------------|-----------------|--------------------|-----|----------------------------|
| <b>Marine birds</b>        |               |                 |                    |     |                            |
| Black guillemot            | 0.370         | Avanersuaq      | 1984               | 26  | Overgaard & Dietz 1989     |
|                            | 0.270         | Avanersuaq      | 2015               | 10  | This study                 |
|                            | 0.320         | Avanersuaq      | 1984-2015          | 36  | Value used in calculations |
| Brünnichs guillemot        | 0.300         | Avanersuaq      | 1984               | 15  | Overgaard & Dietz 1989     |
|                            | 0.296         | Avanersuaq      | 2015               | 11  | This study                 |
|                            | 0.298         | Avanersuaq      | 1984-2015          | 26  | Value used in calculations |
| Common eider               | 0.150         | West Greenland  | 1984               | 20  | Overgaard & Dietz 1989     |
|                            | 0.098         | Avanersuaq      | 2015               | 3   | This study                 |
|                            | 0.124         | Avanersuaq      | 1984-2015          | 3   | Value used in calculations |
| Fulmar                     | 0.470         | Avanersuaq      | 1984               | 14  | Overgaard & Dietz 1989     |
|                            | 0.345         | Avanersuaq      | 2015               | 11  | This study                 |
|                            | 0.407         | Avanersuaq      | 1984-2015          | 25  | Value used in calculations |
| Glaucous gull              | 0.940         | Avanersuaq      | 1984               | 11  | Overgaard & Dietz 1989     |
|                            | 0.588         | Avanersuaq      | 2015               | 11  | This study                 |
|                            | 0.764         | Avanersuaq      | 1984-2015          | 22  | Value used in calculations |
| King eider                 | 0.130         | West Greenland  | 1982               | 21  | Overgaard & Dietz 1989     |
|                            |               | Avanersuaq      | to be sampled 2017 | 20  | This study                 |
| Kittywake                  | 0.390         | Avanersuaq      | 1984               | 14  | Overgaard & Dietz 1989     |
|                            | 0.148         | Avanersuaq      | 2015               | 11  | This study                 |
|                            | 0.269         | Avanersuaq      | 1984-2015          | 25  | Value used in calculations |
| Little auk                 | 0.110         | Avanersuaq      | 1984               | 25  | Overgaard & Dietz 1989     |
|                            | 0.075         | Avanersuaq      | 2015               | 10  | This study                 |
|                            | 0.092         | Avanersuaq      | 1984-2015          | 35  | Value used in calculations |
| <b>Terrestrial birds</b>   |               |                 |                    |     |                            |
| Ptarmigan                  | 0.005         | Avanersuaq      | 1999               | 10  | Johansen et al 2004        |
| <b>Terrestrial mammals</b> |               |                 |                    |     |                            |
| Caribou                    | 0.013         | Avanersuaq      | 1995-1997          | 127 | Astrup et al. 2000         |
| Muskoxen                   | 0.005         | West Greenland  | 1999               | 29  | Johansen 2004              |
| Polar fox                  | 0.051         | Victoria Island | 1973               | 7   | Smith & Armstrong 1975     |
| Arctic hare                | 0.002         | West Greenland  | 1999               | 5   | Johansen 2004              |
| <b>Marine mammals</b>      |               |                 |                    |     |                            |
| Bearded seal               | 0.530         | Amundsen Gulf   | 1973               | 3   | Smith & Armstrong 1975     |
|                            | 0.090         | Belcher Islands | 1974               | 55  | Smith & Armstrong 1975     |
|                            | 0.310         | Canada          | 1973-74            | 58  | Value used in calculations |
| Harp seal all age groups   | 0.228         | Nuuk            | 2001               | 28  | Johansen 2005              |
| Harp seal juvenile         | 0.290         | Davis Strait    | 1998-2009          | 21  | Dietz et al. in press      |
| Harp seal adult            | 0.450         | Davis Strait    | 1998-2009          | 21  | Dietz et al. in press      |
| Harp seal all age groups   | 0.323         | West Greenland  | 1973-2009          | 70  | Value used in calculations |
| Hooded seals 2-4y          | 0.485         | Upernavik       | 1985               | 1   | Dietz et al. 1998          |
| Hooded seals >15           | 0.812         | Upernavik       | 1985               | 2   | Dietz et al. 1998          |
| Hooded seal juvenile       | 0.210         | Davis Strait    | 2002-2008          | 21  | Dietz et al. in press      |
| Hooded seal adult          | 0.610         | Davis Strait    | 2002-2008          | 21  | Dietz et al. in press      |
| Hooded seal all age groups | 0.548         | West Greenland  |                    | 45  | Value used in calculations |
| Walrus                     | 0.057         | Avanersuaq      | 1975-77            | 9   | Born et al. 1981           |
| Beluga                     | 0.281         | Avanersuaq      | 1984-1985          | 41  | Hansen et al 1990          |
| Narwhal males              | 1.820         | Avanersuaq      | 1984               | 11  | Dietz et al. 2004          |
|                            | 0.707         | Avanersuaq      | 1985               | 12  | Dietz et al. 2004          |
| Narwhal females            | 1.070         | Avanersuaq      | 1984               | 25  | Dietz et al. 2004          |
|                            | 0.662         | Avanersuaq      | 1985               | 5   | Dietz et al. 2004          |
|                            | 1.190         | Avanersuaq      | 1993               | 3   | Dietz et al. 2004          |
|                            | 1.340         | Avanersuaq      | 2015               | 10  | This study                 |
| Narwhal all                | 1.132         | Avanersuaq      | 1984-2015          | 66  | Value used in calculations |
| Ringed seal                | 0.241         | Avanersuaq      |                    | 14  | Dietz et al. 1998          |
| Polar bear                 | 0.057         | Avanersuaq      |                    | 36  | Dietz et al. 2000          |

**Table S4** Temporal yearly influx of Hg from the hunted game of Avanersuaq based on average hunt from 1993 to 2013 (Piniarneq 2016).

| Species\Year         | 1993    | 1994    | 1995    | 1996    | 1997    | 1998    | 1999    | 2000    | 2001    | 2002    | 2003    | 2004    | 2005    | 2006    | 2007    | 2008    | 2009    | 2010    | 2011    | 2012    | 2013    | Average |
|----------------------|---------|---------|---------|---------|---------|---------|---------|---------|---------|---------|---------|---------|---------|---------|---------|---------|---------|---------|---------|---------|---------|---------|
| Polar hare           | 0.0015  | 0.0007  | 0.0010  | 0.0009  | 0.0009  | 0.0005  | 0.0006  | 0.0007  | 0.0008  | 0.0007  | 0.0007  | 0.0005  | 0.0003  | 0.0004  | 0.0006  | 0.0006  | 0.0006  | 0.0013  | 0.0004  | 0.0004  | 0.0003  | 0.0007  |
| Ptarmigan            | 0.0022  | 0.0024  | 0.0040  | 0.0018  | 0.0020  | 0.0007  | 0.0009  | 0.0021  | 0.0017  | 0.0010  | 0.0002  | 0.0008  | 0.0013  | 0.0004  | 0.0010  | 0.0045  | 0.0009  | 0.0003  | 0.0007  | 0.0052  | 0.0009  | 0.0017  |
| Musk ox              |         | 0.0004  | 0.0029  | 0.0017  | 0.0025  | 0.0034  | 0.0040  | 0.0046  | 0.0017  | 0.0029  | 0.0071  | 0.0021  | 0.0088  | 0.0067  | 0.0050  | 0.0101  | 0.0063  | 0.0235  | 0.0088  | 0.0147  | 0.0143  | 0.0066  |
| Arctic fox           | 0.0105  | 0.0101  | 0.0081  | 0.0069  | 0.0036  | 0.0074  | 0.0033  | 0.0047  | 0.0130  | 0.0048  | 0.0062  | 0.0059  | 0.0051  | 0.0085  | 0.0081  | 0.0066  | 0.0038  | 0.0089  | 0.0061  | 0.0115  | 0.0024  | 0.0069  |
| Caribou              | 0.0187  | 0.0019  | 0.0140  | 0.0241  | 0.0342  | 0.0319  | 0.0297  | 0.0368  | 0.0368  | 0.0232  | 0.0464  | 0.0277  | 0.0361  | 0.0290  | 0.0168  | 0.0310  | 0.0400  | 0.0600  | 0.0690  | 0.0516  | 0.0503  | 0.0338  |
| Polar bear           | 0.1154  | 0.0770  | 0.1000  | 0.0693  | 0.0385  | 0.0462  | 0.0616  | 0.0462  | 0.0616  | 0.1000  | 0.0923  | 0.0693  | 0.1770  | 0.0616  | 0.0616  | 0.0616  | 0.0693  | 0.0693  | 0.0770  | 0.0616  | 0.0231  | 0.0733  |
| Little auk           | 0.2885  | 0.1167  | 0.1169  | 0.1518  | 0.1033  | 0.0560  | 0.0753  | 0.0746  | 0.0894  | 0.0833  | 0.0553  | 0.0373  | 0.0296  | 0.0598  | 0.0836  | 0.0677  | 0.0712  | 0.0796  | 0.0878  | 0.0432  | 0.0377  | 0.0861  |
| Marine birds - LA    | 0.3011  | 0.1907  | 0.2117  | 0.2046  | 0.1134  | 0.1288  | 0.1246  | 0.1436  | 0.1797  | 0.0667  | 0.0357  | 0.0296  | 0.1330  | 0.0478  | 0.0904  | 0.0864  | 0.0464  | 0.0641  | 0.0693  | 0.0725  | 0.1118  | 0.1168  |
| Hooded seal          | 0.2200  | 13.9564 | 0.6601  | 0.4086  | 0.1572  | 0.1257  | 0.1100  | 0.0943  | 0.1257  | 0.1257  | 0.5029  | 0.2200  | 0.2515  | 0.5029  | 0.7544  | 0.3143  | 0.4244  | 0.5344  | 0.1257  | 0.4086  | 0.3143  | 0.9684  |
| Harp seal            | 1.3670  | 0.9639  | 0.6718  | 1.5831  | 0.6718  | 0.5608  | 0.5667  | 0.6601  | 0.6017  | 0.6075  | 0.4089  | 0.3680  | 1.0048  | 0.9113  | 0.9931  | 1.1917  | 0.9873  | 2.2783  | 2.5587  | 1.1917  | 1.2034  | 1.0167  |
| Beluga               | 6.6597  | 1.9389  | 2.1918  | 4.4215  | 1.1802  | 1.9389  | 1.5174  | 0.6744  | 0.5480  | 0.4215  | 1.1802  | 0.1686  | 0.2529  | 0.3372  | 0.2529  | 0.9273  | 1.2645  | 0.2529  | 0.4215  | 1.9389  | 0.2529  | 1.1782  |
| Walrus               | 6.5240  | 3.9200  | 3.4160  | 3.0800  | 2.0160  | 1.7360  | 2.7160  | 3.4160  | 3.9760  | 3.2480  | 3.3040  | 2.2120  | 1.8760  | 1.7640  | 1.2600  | 0.7560  | 1.2880  | 1.0360  | 0.9240  | 1.7080  | 0.9520  | 2.4347  |
| Bearded seal         | 3.8068  | 3.7353  | 4.2536  | 5.1294  | 3.4851  | 2.1804  | 3.7532  | 2.6272  | 3.4315  | 2.5558  | 2.3055  | 1.7336  | 2.3592  | 2.6987  | 2.2698  | 3.0919  | 2.9847  | 5.0579  | 3.8426  | 2.8417  | 2.8417  | 3.1898  |
| Ringed seal          | 5.5261  | 5.6129  | 6.3335  | 7.0541  | 5.1140  | 4.9453  | 5.0947  | 3.9259  | 4.8610  | 4.9116  | 4.0946  | 3.6584  | 6.9866  | 6.0371  | 6.2564  | 6.7094  | 6.6444  | 5.6563  | 6.7022  | 5.5502  | 3.9572  | 5.5063  |
| Narhval              | 36.3825 | 31.1850 | 30.4920 | 12.8205 | 20.0970 | 24.6015 | 36.0360 | 36.3825 | 44.3520 | 28.0665 | 34.6500 | 53.7075 | 44.0055 | 23.5620 | 37.7685 | 39.5010 | 28.4130 | 38.1150 | 32.5710 | 44.0055 | 29.4525 | 33.6270 |
| Sum                  | 61.5253 | 61.9031 | 48.6752 | 31.1387 | 33.1305 | 36.4604 | 50.1045 | 48.2372 | 57.9121 | 40.2859 | 46.7258 | 62.2710 | 57.2606 | 36.0753 | 49.9126 | 52.8467 | 41.8665 | 53.3017 | 47.5341 | 57.9780 | 39.3267 | 48.3082 |
| Hg PTWI (60 Kg) (mg) | 0.1     | 0.1     | 0.1     | 0.1     | 0.1     | 0.1     | 0.1     | 0.1     | 0.1     | 0.1     | 0.1     | 0.1     | 0.1     | 0.1     | 0.1     | 0.1     | 0.1     | 0.1     | 0.1     | 0.1     | 0.1     | 0.1     |
| Hg PTYI (60 Kg) (mg) | 5.0     | 5.0     | 5.0     | 5.0     | 5.0     | 5.0     | 5.0     | 5.0     | 5.0     | 5.0     | 5.0     | 5.0     | 5.0     | 5.0     | 5.0     | 5.0     | 5.0     | 5.0     | 5.0     | 5.0     | 5.0     | 5.0     |
| Population number    | 868     | 876     | 881     | 879     | 870     | 875     | 857     | 864     | 875     | 854     | 859     | 859     | 850     | 865     | 846     | 831     | 802     | 795     | 821     | 796     | 801     | 849     |
| NOW Hg PTYI (g)      | 4.3     | 4.4     | 4.4     | 4.4     | 4.3     | 4.4     | 4.3     | 4.3     | 4.4     | 4.3     | 4.3     | 4.3     | 4.2     | 4.3     | 4.2     | 4.1     | 4.0     | 4.0     | 4.1     | 4.0     | 4.0     | 4.2     |
| Sum Hg Influx/PTYI   | 14.2    | 14.2    | 11.1    | 7.1     | 7.6     | 8.3     | 11.7    | 11.2    | 13.3    | 9.4     | 10.9    | 14.5    | 13.5    | 8.4     | 11.8    | 12.7    | 10.5    | 13.4    | 11.6    | 14.6    | 9.8     | 11.4    |

**Table S5** Seasonal Hg load in the hunted game of Avanersuaq based on average hunt from 1994 to 2014 (Piniarneq 2016) and average Hg loads in muscle tissue from published and unpublished contaminant studies in Greenland.

| Species\Month             | 1       | 2       | 3       | 4       | 5       | 6        | 7        | 8        | 9        | 10      | 11      | 12      |
|---------------------------|---------|---------|---------|---------|---------|----------|----------|----------|----------|---------|---------|---------|
| Polar hare                | 0.00002 | 0.00009 | 0.00007 | 0.00013 | 0.00001 | 0.00000  | 0.00000  | 0.00001  | 0.00009  | 0.00006 | 0.00003 | 0.00004 |
| Hooded seal               | 0.00000 | 0.00629 | 0.00000 | 0.01572 | 0.00000 | 0.04401  | 0.04401  | 0.03143  | 0.10687  | 0.09116 | 0.00314 | 0.00000 |
| Other birds               | 0.00013 | 0.00020 | 0.00024 | 0.00037 | 0.00789 | 0.02190  | 0.01071  | 0.00151  | 0.00258  | 0.00180 | 0.00002 | 0.00001 |
| Little auk                | 0.00000 | 0.00000 | 0.00021 | 0.00000 | 0.02912 | 0.05339  | 0.02602  | 0.00211  | 0.00003  | 0.00107 | 0.00000 | 0.00000 |
| Polar bear                | 0.00385 | 0.01154 | 0.01385 | 0.02309 | 0.00693 | 0.00770  | 0.00077  | 0.00000  | 0.00462  | 0.00077 | 0.00000 | 0.00000 |
| Bedlamer                  | 0.00680 | 0.00185 | 0.00124 | 0.00062 | 0.00124 | 0.00803  | 0.01421  | 0.05068  | 0.27686  | 0.23175 | 0.01792 | 0.00742 |
| Musk oxen                 | 0.00000 | 0.00000 | 0.00071 | 0.00109 | 0.00000 | 0.00004  | 0.00004  | 0.00319  | 0.00344  | 0.00147 | 0.00004 | 0.00000 |
| Saddleback                | 0.01392 | 0.00619 | 0.00077 | 0.00851 | 0.00619 | 0.01083  | 0.02475  | 0.12373  | 0.40445  | 0.26680 | 0.02861 | 0.01083 |
| Harp seal                 | 0.02072 | 0.00804 | 0.00201 | 0.00912 | 0.00742 | 0.01886  | 0.03896  | 0.17441  | 0.68132  | 0.49855 | 0.04654 | 0.01824 |
| Caribou                   | 0.00000 | 0.00013 | 0.00555 | 0.00277 | 0.00052 | 0.00006  | 0.00006  | 0.01387  | 0.01290  | 0.00529 | 0.00000 | 0.00000 |
| Walrus                    | 0.00667 | 0.01867 | 0.05067 | 0.05333 | 0.11200 | 0.05867  | 0.01733  | 0.00533  | 0.01600  | 0.28000 | 0.03600 | 0.00133 |
| Bearded seal              | 0.08215 | 0.13250 | 0.11395 | 0.12985 | 0.39485 | 0.84535  | 0.59625  | 0.59890  | 0.78705  | 0.62540 | 0.06625 | 0.03445 |
| Narwhal                   | 0.01126 | 0.06756 | 0.11260 | 0.05630 | 0.34906 | 2.71366  | 3.47934  | 3.96352  | 0.75442  | 0.47292 | 0.05630 | 0.02252 |
| Ringed seals              | 0.47236 | 0.36222 | 0.23401 | 0.26558 | 0.48730 | 0.43211  | 0.26414  | 0.44947  | 1.04136  | 0.69432 | 0.52996 | 0.58298 |
| <b>Total</b>              | 0.61854 | 0.61601 | 0.53672 | 0.56696 | 1.41041 | 4.23653  | 4.52731  | 5.41988  | 4.09562  | 3.17508 | 0.78601 | 0.67837 |
| <b>NOW Hg PTMI (g)</b>    | 0.32592 | 0.32592 | 0.32592 | 0.32592 | 0.32592 | 0.32592  | 0.32592  | 0.32592  | 0.32592  | 0.32592 | 0.32592 | 0.32592 |
| <b>Sum Hg Influx/PTMI</b> | 1.89780 | 1.89003 | 1.64676 | 1.73954 | 4.32742 | 12.99850 | 13.89066 | 16.62924 | 12.56616 | 9.74177 | 2.41162 | 2.08138 |
